# Supplementary material for: Hydrocarbon-Contaminated Sites: Is There Something More Than Exophiala xenobiotica? New Insights into Black Fungal Diversity Using the Long Cold Incubation Method
Source: MDPI journal article supplement (doi:10.3390/jof7100817), 2021-09-29
Supplement: s1 [file s1]

**Table S1.** List of the species used to infer the phylogenetic position of the strains in study by ML ITS trees, reported respectively in Figure S3-S6. T indicates ex-type strains.

| Species ID                     | Collection No                                     | Source                                     | Country      | Accession No | References |
|--------------------------------|---------------------------------------------------|--------------------------------------------|--------------|--------------|------------|
| Herpotrichiellaceae ITS tree   |                                                   |                                            |              |              |            |
| <i>Cyphellophora europaea</i>  | CBS 656.82                                        | Human nail                                 | France       | JQ766442     | [1]        |
| <i>Cyphellophora olivacea</i>  | IFM 53357                                         | -                                          | -            | AB190379     | [1]        |
| <i>Cyphellophora olivacea</i>  | CCFEE 6619                                        | Etruscan tomb                              | Italy        | MT472271     | [2]        |
| <i>Cyphellophora reptans</i>   | CBS 113.85 T                                      | Foodstuff                                  | Sweden       | JQ766445     | [1]        |
| <i>Cyphellophora sessilis</i>  | CBS 243.85 T                                      | Resin of <i>Picea abies</i>                | Netherlands  | EU514700     | [3]        |
| <i>Cyphellophora sessilis</i>  | CBS 238.93                                        | Styrene air biofilter                      | Netherlands  | AY857541     | [3]        |
| <i>Cyphellophora</i> sp.       | CCFEE 6668                                        | Etruscan tomb                              | Italy        | MT472288     | [1]        |
| <i>Exophiala bergeri</i>       | CBS 353.52 T                                      | Chromomycosis, man                         | Canada       | EF551462     | [4]        |
| <i>Exophiala bergeri</i>       | UTHSC94-540                                       | Index finger                               | USA          | EF025404     | [4]        |
| <i>Exophiala bonariae</i>      | CBS 139957 T = CCFEE 5792                         | Marble, funerary monument                  | Italy        | JX681046     | [5]        |
| <i>Exophiala bonariae</i>      | CCFEE 5899                                        | Marble, funerary monument                  | Italy        | KP791795     | [5]        |
| <i>Exophiala capensis</i>      | CBS 128771 T = CPC 18473                          | Leaf bracts of <i>Phaenocoma prolifera</i> | South Africa | JF499841     | [6]        |
| <i>Exophiala castellanii</i>   | CBS 158.58 T = ATCC 18657 = IFM 4702 = MUCL 10097 | Skin scrapings, human patient              | Sri Lanka    | MH857734     | [7]        |
| <i>Exophiala castellanii</i>   | CBS 110025                                        | Drinking water                             | Germany      | JF747072     | [7]        |
| <i>Exophiala crusticola</i>    | CP141b T                                          | Soil crust                                 | USA          | AM048755     | [8]        |
| <i>Exophiala dermatitidis</i>  | CBS 207.35 T                                      | Facial chromomycosis                       | Japan        | AF050269     | [9]        |
| <i>Exophiala dermatitidis</i>  | CBS109154                                         | Brain human                                | South Korea  | AY857525     | [9]        |
| <i>Exophiala dermatitidis</i>  | NH 166                                            | bathroom                                   | Japan        | AB498923     | [9]        |
| <i>Exophiala equina</i>        | CBS 119.23 T                                      | Horse                                      | Italy        | JF747094     | [7]        |
| <i>Exophiala equina</i>        | IFM 46120                                         | Soil                                       | Brazil       | LC600987     | [7]        |
| <i>Exophiala heteromorpha</i>  | CBS 633.69= DAOM 75853k = MUCL 15475              | Railway tie                                | Canada       | AY857522     | [9]        |
| <i>Exophiala heteromorpha</i>  | CBS 232.33 T= CDC B-2823 = MUCL 9894              | Wood pulp                                  | Sweden       | AY857524     | [9]        |
| <i>Exophiala jeanselmei</i>    | CBS 528.76= ATCC 10224                            | Skin, human                                | -            | AY857530     | [10]       |
| <i>Exophiala jeanselmei</i>    | CBS 507.90 T                                      | Man, mycethoma                             | Uruguay      | AF050271     | [10]       |
| <i>Exophiala lecanii-corni</i> | CBS 123.33                                        | Scale insect, <i>Lecanium corni</i>        | -            | AY857528     | [9]        |
| <i>Exophiala lecanii-corni</i> | CBS 102400                                        | Air biofilter                              | USA          | AY857527     | [9]        |
| <i>Exophiala lecanii-corni</i> | CCFEE 5689                                        | Soap dispenser washing machine             | Italy        | JX681038     | [11]       |
| <i>Exophiala mesophila</i>     | CBS 402.95 T                                      | Shower joint                               | Germany      | JF747111     | [7]        |

|                                  |                                       |                                          |                 |           |      |
|----------------------------------|---------------------------------------|------------------------------------------|-----------------|-----------|------|
| <i>Exophiala mesophila</i>       | CBS 119910                            | Dental waterline                         | USA             | JF747113  | [7]  |
| <i>Exophiala mesophila</i>       | CCFFEE 5821                           | Kitchen sponge                           | Italy           | JX681041  | [11] |
| <i>Exophiala nigra</i>           | CBS 535.94 T                          | Arctic water                             | Russia          | MH862481  | [4]  |
| <i>Exophiala nigra</i>           | CBS 546.82                            | Arctic water                             | Russia          | MH861525  | [4]  |
| <i>Exophiala oligosperma</i>     | CBS 113408                            | Toluene air biofilter                    | Spain           | AY857531  | [9]  |
| <i>Exophiala oligosperma</i>     | CBS 725.88 T                          | Tumor, human                             | Germany         | AY163551  | [9]  |
| <i>Exophiala oligosperma</i>     | CBS 124190                            | Bathroom flask                           | the Netherlands | GQ426977  | [9]  |
| <i>Exophiala oligosperma</i>     | CBS 579.76                            | Brain, human                             | Japan           | AY857533  | [9]  |
| <i>Exophiala opportunistica</i>  | CBS 109811 T                          | Drinking water                           | Germany         | JF747123  | [9]  |
| <i>Exophiala phaeomuriformis</i> | CBS 124194                            | Bathroom flask                           | the Netherlands | GQ426970  | [12] |
| <i>Exophiala phaeomuriformis</i> | CBS 137224                            | Concrete railway sleeper                 | Turkey          | KJ522802  | [12] |
| <i>Exophiala pisciphila</i>      | CBS 537.73 T                          | Channel catfish, Alabama                 | USA             | AF050272  | [7]  |
| <i>Exophiala pisciphila</i>      | CCF 4488                              | Stomach of <i>Paracheirodon axelrodi</i> | Czech Republic  | LT604105  | [7]  |
| <i>Exophiala salmonis</i>        | CBS 157.67 T                          | Cerebral mycetoma                        | Canada          | AF050274  | [7]  |
| <i>Exophiala salmonis</i>        | CBS 110371                            | Drinking water                           | the Netherlands | JF747139  | [7]  |
| <i>Exophiala sideris</i>         | CBS 121818 T                          | Berry of <i>Sorbus aucuparia</i>         | the Netherlands | HQ452311  | [13] |
| <i>Exophiala sideris</i>         | CBS 121828                            | Oak railway tie                          | the Netherlands | HQ452325  | [13] |
| <i>Exophiala</i> sp.             | CCFEE 6622                            | Etruscan tomb                            | Italy           | MT472280  | [1]  |
| <i>Exophiala spinifera</i>       | CBS 899.68 T=ATCC 18218 =<br>DSM 1217 | Nasal granuloma, human                   | USA             | AY156976  | [4]  |
| <i>Exophiala spinifera</i>       | CBS 101537                            | Cactus                                   | Venezuela       | AY156970  | [4]  |
| <i>Exophiala xenobiotica</i>     | CBS 118157 T                          | Oil contaminated soil                    | Venezuela       | NR_11120  | [14] |
| <i>Exophiala xenobiotica</i>     | CBS 117647=UTHSC 00-2163              | Wrist wound, human                       | USA             | KP132147. | [14] |
| <i>Exophiala xenobiotica</i>     | CBS 522.76                            | Decaying timber                          | UK              | KP132164  | [14] |
| <i>Minimelanolcus melanicus</i>  | MFLUCC 15-0415 T                      | Decaying wood submerged in a stream      | China           | KR215608  | [15] |
| <i>Minimelanolocus curvatus</i>  | MFLUCC 15-0259 T                      | Decaying wood submerged in a stream      | China           | KR215614  | [15] |
| <i>Rhinocladiella similis</i>    | dH 13054                              | Brain, human                             | Slovenia        | AY857529  | [10] |
| <i>Rhinocladiella similis</i>    | CBS 120259                            | biofilter eliminating gasoline vapors    | -               | KP132555  | [16] |
| <i>Rhinocladiella similis</i>    | CBS 111763 T                          | Chronic cutaneous ulcer, human           | Brazil          | MH862885  | [10] |
| Trichomeriaceae ITS tree         |                                       |                                          |                 |           |      |
| <i>Bradomyces alpinus</i>        | CCFEE 5493 T=CBS138368 = CCF 4803     | Natural rock, Monte Rosa                 | Italy           | NR_132844 | [17] |
| <i>Bradomyces graniticola</i>    | CCF 5193 T                            | Granite wall of a metro station          | Sweden          | NR_153653 | [18] |
| <i>Bradomyces oncorhynchi</i>    | CCF 4369 T= CBS 133066 = CCFEE 6134   | Spleen of <i>Oncorhynchus mykiss</i>     | Czech Republic  | HG426062  | [17] |

|                                      |                         |                                               |                    |             |             |
|--------------------------------------|-------------------------|-----------------------------------------------|--------------------|-------------|-------------|
| <i>Knufia aspidioti</i>              | BJ01A29                 | Scale insect, <i>Aspidioti</i> sp.            | China              | KF589944    | [19]        |
| <i>Knufia aspidioti</i>              | BJ01A10                 | Scale insect, <i>Aspidioti</i> sp.            | China              | KF589943    | [19]        |
| <i>Knufia cryptophialidica</i>       | DAOM 216555 T           | Black galls, <i>Populus tremuloides</i>       | Canada             | JN040501    | [20]        |
| <i>Knufia endospora</i>              | UAMH 10396              | Bark, <i>Populus tremuloides</i>              | Canada             | JN040510    | [21]        |
| <i>Knufia epidermidis</i>            | CBS 120353              | Skin infection                                | China              | EU730589    | [22]        |
| <i>Knufia epidermidis</i>            | CBS 123466              | Nail with onychomycosis                       | China              | FJ355955    | [22]        |
| <i>Knufia mediterranea</i>           | CCFEE 6205              | Marble, funerary monument                     | Italy              | KP791794    | [23]        |
| <i>Knufia mediterranea</i>           | CCFEE 6211              | Marble, funerary monument                     | Italy              | KP791793    | [23]        |
| <i>Knufia peltigerae</i>             | UAMH 11090              | thalli of <i>Peltigera rufescens</i>          | Luxembourg         | HQ709322    | [23]        |
| <i>Knufia peltigerae</i>             | CGMCC 3.17296           | Rock                                          | China              | KP226561    | [24]        |
| <i>Knufia perfecta</i>               | CPC 12173               | <i>Prunus</i> sp.                             | Canada             | EU035422    | [25]        |
| <i>Knufia perfecta.</i>              | IRAN 2553C T            | Dead branch, <i>Juglans regia</i>             | Iran               | MF062036    | [25]        |
| <i>Knufia perforans</i>              | CBS 885.95 T            | Marble                                        | Greece             | AJ244230    | [22]        |
| <i>Knufia petricola</i>              | CBS 123.872= A95        | Marble statue                                 | Italy              | KC978734    | [23]        |
| <i>Knufia petricola</i>              | CBS 726.95 T            | Marble statue                                 | Italy              | KC978746    | [26]        |
| <i>Knufia petricola</i>              | CBS 725.95              | Calcaremite obelisque                         | Greece             | KC978745    | [23]        |
| <i>Knufia petricola</i>              | IMI 38917=ch49          | Marble                                        | Crimea             | AJ507323    | [23]        |
| <i>Knufia separata</i>               | CGMCC 3.17337           | Rock                                          | China              | KP174856    | [24]        |
| <i>Knufia</i> sp.                    | CCFEE 5323              | Thallus of <i>Lecanora</i> sp                 | Antarctica         | FJ392866    | [22]        |
| <i>Knufia</i> sp.                    | CCFEE 5314              | Thallus of <i>Xanthoria elegans</i>           | Antarctica         | FJ392865    | [22]        |
| <i>Knufia</i> sp.                    | CCFEE 5817              | Gasoline car tank                             | Italy              | Unpublished | [11]        |
| <b>Knufia</b> sp.                    | MUT4888                 | Mediterranean Sea, <i>Flabellia petiolata</i> | Italy              | KR014348    | Unpublished |
| <i>Knufia tsuneda</i>                | CPC 22931 T             | Soil                                          | Spain              | HG003669    | [27]        |
| <i>Knufia vaticanii</i>              | CBS 139722 T=CCFEE 5939 | Travertine                                    | Vatican City State | KP791780    | [23]        |
| <i>Lithohypha aloicola</i>           | CPC 35996 T             | Leaves of <i>Aloe</i> sp.                     | South Africa       | MN562103    | [28]        |
| <i>Lithohypha guttulata</i>          | CCFEE 5884              | Marble                                        | Vatican City State | KP791768    | [23]        |
| <i>Lithohypha guttulata</i>          | CCFEE 5909              | Marble                                        | Vatican City State | KP791771    | [23]        |
| <i>Metulocladosporiella musicola</i> | CBS113873               | <i>Musa sapientum</i>                         | Mozambique         | DQ008135    | [29]        |
| <i>Metulocladosporiella musicola</i> | CBS 110960 T            | <i>Musa acuminata</i>                         | South Africa       | DQ008127    | [29]        |
| <i>Metulocladosporiella musicola</i> | CBS113864               | <i>Musa</i> sp.                               | Uganda             | DQ008133    | [29]        |
| <i>Metulocladosporiella musicola</i> | CBS113865               | <i>Musa sapientum</i>                         | Uganda             | DQ008134    | [29]        |
| <i>Trichomerium deniquatum</i>       | MFLUCC 10-0884 T        | Leaf of <i>Psidium guajava</i>                | Thailand           | JX3136554   | [30]        |
| <i>Trichomerium foliicola</i>        | MFLUCC 10-0078 T        | Leaf of <i>Murray apaniculata</i>             | Thailand           | JX313655    | [30]        |
| <i>Trichomerium foliicola</i>        | MFLUCC 10-0054          | <i>Mangifera indica</i>                       | Thailand           | JX313651    | [30]        |
| Mycosphaerellaceae ITS tree          |                         |                                               |                    |             |             |
| <i>Arthrocatena tenebrio</i>         | CBS 136100= CCFEE 5413  | Punta Indren, Monte Rosa                      | Italy              | KF309948    | [31]        |

|                                    |                           |                                                                  |                 |          |      |
|------------------------------------|---------------------------|------------------------------------------------------------------|-----------------|----------|------|
| <i>Cladosporium herbarum</i>       | CBS 121621=CPC 12177      | <i>Hordeum vulgare</i>                                           | the Netherlands | MH863124 | [32] |
| <i>Cladosporium hillianum</i>      |                           |                                                                  |                 |          |      |
| <i>Cladosporium iridis</i>         | CBS 138.40T = CPC 15458   | <i>Iris</i> sp.                                                  | the Netherlands | EF679370 | [33] |
| <i>Hyphoconis sterilis</i>         | CBS 118321= TRN287        | Natural rocks, Central Mountain System                           | Spain           | AY843126 | [31] |
| <i>Neodevriesia</i> sp.            | CBS 118302 = TRN142       | Rock sample: Mallorca                                            | Spain           | AY559374 | [31] |
| <i>Neodevriesia agapanthi</i>      | CBS 132689 T=CPC 19833    | Leaves of <i>Agapanthus africanus</i>                            | South Africa    | JX069875 | [31] |
| <i>Neodevriesia bulbillosa</i>     | CBS 118285 T=TRN81        | Limestone, Mallorca                                              | Spain           | AY559341 | [31] |
| <i>Neodevriesia capensis</i>       | CBS 130602 T = CPC 18299  | <i>Protea</i> sp.                                                | South Africa    | JN712501 | [28] |
| <i>Neodevriesia capensis</i>       | CPC 13981                 | <i>Protea repens</i>                                             | South Africa    | EU707887 | [28] |
| <i>Neodevriesia imbrexigena</i>    | CAP 1371                  | Glazed decorative tiles in association with <i>Trebouxia</i> sp. | Portugal        | JX915745 | [34] |
| <i>Neodevriesia imbrexigena</i>    | CAP 1373                  | Glazed decorative tiles in association with <i>Trebouxia</i> sp. | Portugal        | JX915746 | [34] |
| <i>Neodevriesia knoxdaviesii</i>   | CBS 122898=CPC 14905      | <i>Protea</i> sp.                                                | South Africa    | EU707866 | [28] |
| <i>Neodevriesia lagerstroemiae</i> | CBS 125422 T=CPC 14403    | <i>Lagerstroemia indica</i>                                      | USA             | GU214634 | [28] |
| <i>Neodevriesia modesta</i>        | CBS 137182 T=CCFEE 5672   | Wallpainting, Cave,                                              | Italy           | KF309984 | [31] |
| <i>Neodevriesia queenslandica</i>  | CBS 129527 T = CPC 17306  | <i>Scaevola taccada</i>                                          | Australia       | JF951148 | [28] |
| <i>Neodevriesia sardiniae</i>      | CBS 139724 T = CCFEE 6202 | Marble, funerary monument                                        | Italy           | KP791765 | [23] |
| <i>Neodevriesia sardiniae</i>      | CCFEE 6210                | Marble, funerary monument                                        | Italy           | KP791766 | [23] |
| <i>Neodevriesia shakazului</i>     | CBS 133579 T= CPC 19784   | Leaves of <i>Aloe</i> sp.                                        | South Africa    | KC005776 | [28] |
| <i>Neodevriesia simplex</i>        | CBS 137183 T=CCFEE 5681   | Wallpainting, Cave                                               | Italy           | KF309985 | [31] |
| <i>Neodevriesia stirlingiae</i>    | CBS 133581 T=CPC 19948E   | leaves of <i>Stirlingia latifolia</i>                            | Australia       | KC005778 | [28] |
| <i>Neodevriesia strelitziae</i>    | CBS 122379 T              | leaves of <i>Strelitzia nicolai</i>                              | South Africa    | EU436763 | [28] |
| <i>Neodevriesia</i> sp.            | CBS 118302=TRN142         | Limestone, Mallorca                                              | Spain           | AY559374 | [31] |
| <i>Extremus</i> sp.                | CBS 18300=TRN137          | Limestone, Mallorca                                              | Spain           | AY559369 | [31] |
| <i>Extremus adstrictus</i>         | CBS 118292 T= TRN96       | Limestone, Mallorca                                              | Spain           | AY559346 | [31] |
| <i>Extremus antarcticus</i>        | CBS 136104=CCFEE 5207     | Rock, Inexpressible Island                                       | Antarctica      | KF309980 | [31] |
| <i>Extremus antarcticus</i>        | CCFEE 5312                | Rock, Vegetation Island                                          | Antarctica      | KF309979 | [31] |
| <i>Petrophila incerta</i>          | CBS 118305=TRN62          | Limestone, Mallorca                                              | Spain           | AY559328 | [31] |
| <i>Petrophila incerta</i>          | CBS 118608 T=TRN139b      | Limestone, Mallorca                                              | Spain           | AY559372 | [31] |
| <i>Saxophila tyrrhenica</i>        | CBS 139725 T = CCFEE 5935 | Marble angels                                                    | Italy           | KP791764 | [23] |
| <i>Saxophila tyrrhenica</i>        | TRN65                     | Limestone, Mallorca                                              | Spain           | AY559329 | [23] |
| <i>Vermiconidia antarctica</i>     | CBS 136107 T=CCFEE 5488   | Rock, Battleship Promontory                                      | Antarctica      | KF309982 | [31] |
| <i>Vermiconidia antarctica</i>     | CBS 136108=CCFEE 5489     | Rock, Battleship Promontory                                      | Antarctica      | KF309983 | [31] |
| <i>Vermiconia flagrans</i>         | CBS 118283 T=TRN124       | Limestone, Mallorca                                              | Spain           | AY559359 | [31] |
| <i>Vermiconidia flagrans</i>       | CBS 118284=TRN104         | Limestone, Mallorca                                              | Spain           | AY559348 | [31] |

Sympoventuriaceae ITS tree

|                                     |                        |                                                            |                  |           |       |
|-------------------------------------|------------------------|------------------------------------------------------------|------------------|-----------|-------|
| <i>Scolecobasidium anellii</i>      | CBS 284.64 T           | Cartellana cave, stalactites                               | Italy            | FR832477  | [35]  |
| <i>Scolecobasidium anomalum</i>     | CBS 131816 T           | Lascaux cave, painted gallery                              | France           | HE575201  | [35]  |
| <i>Scolecobasidium aquaticum</i>    | CBS 140316 T           | cold shower of fish-processing company                     | Germany          | NR_164397 | [20]  |
| <i>Scolecobasidium bacilliforme</i> | CBS 100442 T           | biofilm on stainless steel in drinking water               | Germany          | NR_155566 | [36]  |
| <i>Scolecobasidium capsici</i>      | CPC 28782 T            | Capsicum annuum                                            | Thailand         | NR_155602 | [37]  |
| <i>Scolecobasidium constricta</i>   | CBS 202.27 T           | Soil                                                       | USA              | AB161063  | [37]  |
| <i>Scolecobasidium cordanae</i>     | CBS 475.80 T           | Dead leaf                                                  | Colombia         | KF156022  | [38]  |
| <i>Scolecobasidium dracaenae</i>    | CBS 141323             | Leaf spot, <i>Dracaena</i> sp.                             | USA              | NR_145404 | [39]  |
| <i>Scolecobasidium gamsii</i>       | CBS 239.78 T           | Plant leaf                                                 | Sri Lanka        | KF156019  | [38]  |
| <i>Scolecobasidium globale</i>      | CBS 119644 T           | Domestic sample                                            | Germany          | KF961086  | [40]] |
| <i>Scolecobasidium humicola</i>     | CBS 116655 T           | Peat soil                                                  | Canada           | HQ667521  | [41]  |
| <i>Scolecobasidium icarus</i>       | CBS 536.69 T           | Forest soil                                                | Canada           | HQ667524  | [38]  |
| <i>Scolecobasidium lascauxense</i>  | CBS 131815 T           | Lascaux cave, passageway                                   | France           | FR832474  | [35]  |
| <i>Scolecobasidium longiphorum</i>  | CBS 435.76             | Soil                                                       | Canada           | KF156038  | [41]  |
| <i>Scolecobasidium macrozamia</i>   | CBS 102491             | <i>Macrozamia</i> (Zamiaceae) leaf litter                  | Australia        | KF156021  | [42]  |
| <i>Scolecobasidium minimum</i>      | CBS 510.71 T           | Rhizosphere                                                | Nigeria          | HQ667522  | [41]  |
| <i>Scolecobasidium musae</i>        | CBS 729.95             | Fruit surface of Japanese fiber banana, <i>Musa basjoo</i> | China            | KF156029  | [20]  |
| <i>Scolecobasidium olivaceum</i>    | CBS 137170 T           | Bronchoalveolar fluid                                      | USA              | LM644521  | [38]  |
| <i>Scolecobasidium pandanicolum</i> | CPC 263170 T           | Leaves of <i>Pandanus</i> sp.                              | France           | NR145399  | [43]  |
| <i>Scolecobasidium podocarpi</i>    | CPC 37078 T=CBS 143174 | <i>Podocarpus grayae</i>                                   | Australia        | NR_156654 | [43]  |
| <i>Scolecobasidium ramosum</i>      | CBS 137173 T           | Nail                                                       | USA              | LM644524  | [38]  |
| <i>Scolecobasidium robustum</i>     | CBS 112.97 T           | Leaf litter of <i>Quercus ilex</i>                         | Spain            | NR_155567 | [36]  |
| <i>Scolecobasidium sexuale</i>      | CBS 131765 T           | Domestic sample                                            | South Africa     | KF156018  | [38]  |
| <i>Scolecobasidium tshawytschae</i> | CBS 100438 T           | Fish                                                       | USA              | HQ667562  | [41]  |
| <i>Scolecobasidium verrucosum</i>   | CBS 383.81 T           | Soil                                                       | India            | KF156015  | [42]  |
| <i>Scolecobasidium ailanthi</i>     | MFLUCC 17-0923         | <i>Ailanthus</i> sp.                                       | Thailand         | NR_163326 | [44]  |
| <i>Scolecobasidium phaeophorum</i>  | CBS 206.96             | Leaf coastal rain forest                                   | Papua New Guinea | NR_155565 | [36]  |
| <i>Verruconis calidifluminalis</i>  | IFM 54738              | Hot spring river                                           | Japan            | AB385698  | [45]  |
| <i>Verruconis gallopava</i>         | CBS 437.64             | Brain                                                      | Turkey           | HQ667553  | [45]  |

ATCC American Type Culture Collection, Rockville, Maryland, USA; CAP Culture Collection of Alan Phillips, housed at M&B-BioISI, Tec Labs, University of Lisbon, Portugal; CBS CBS Fungal Biodiversity Centre, Centraalbureau voor Schimmelcultures, Utrecht, The Netherlands; CCF Culture Collection of Fungi, Dept of Botany, Charles University, Prague, Czech Republic; CCFEE Culture Collection of Fungi from Extreme Environments, Dept. of Ecological and Biological Sciences, University of Tuscia, Viterbo, Italy; CDC Centers for Disease Control and Prevention, Atlanta, Georgia, USA, CGMCC China General Microbiological Culture Collection Center Institute of Microbiology Chinese Academy of Sciences Beijing China; CPC Collection Pedro Crous, housed at CBS; DSMZ Deutsche Sammlung von Mikroorganismen und Zellkulturen, Baunschweig, Germany; DAOM Plant Research Institute, Department of Agriculture (Mycology), Ottawa, Canada; dH Culture collection of Sybren de Hoog, housed at

CBS; IFM Research Center for Pathogenic Fungi and Microbial Toxicoses, Chiba, Japan; *IMI* International Mycological Institute Collection is embedded in the CABI UK Centre in Egham, UK; IRAN Iranian fungal culture collection part of the Herbarium Ministerii Iranici Agriculturae; Tehran, Iran MFLUCC: Mae Fah Luang University Culture Collection, Thailand; *MUCL* Mycothèque de l'Université catholique de Louvain, Louvain-la-Neuve, Belgium; *MUT* Mycotheca Universitatis Taurinensis, Dept of life Sciences, University of Torino; *NH* Nabuo Hamada personal collection; *TRN* T. Ruibal personal collection; *UAMH* University of Alberta Microfungus Collection and Herbarium, Canada, *UTHSC* University of Texas Health Science, Center Fungus Testing Laboratory -Dept. of Pathology, San Antonio, Texas, U.S.A.

## References

- Feng, P.; Lu, Q.; Najafzadeh, M.J.; Gerrits van den Ende, A.H.G.; Sun, J.; Li, R.; Xi, L.; Vicente, V.A.; Lai, W.; Lu, C.; et al. *Cyphellophora* and its relatives in *Phialophora*: Biodiversity and possible role in human infection. *Fungal Divers.* **2012**, *65*, 17–45, doi:10.1007/s13225-012-0194-5.
- Isola, D.; Zucconi, L.; Cecchini, A.; Caneva, G. Dark-pigmented biodeteriogenic fungi in Etruscan hypogeal tombs: New data on their culture-dependent diversity, favouring conditions, and resistance to biocidal treatments. *Fungal Biol.* **2021**, doi:10.1016/j.funbio.2021.03.003.
- Gao, L.; Ma, Y.; Zhao, W.; Wei, Z.; Gleason, M.L.; Chen, H.; Hao, L.; Sun, G.; Zhang, R. Three new species of *Cyphellophora* (chaetothyriales) associated with sooty blotch and flyspeck. *PLoS ONE* **2015**, *10*, e0136857, doi:10.1371/journal.pone.0136857.
- Zeng, J.S.; de Hoog, G.S. *Exophiala spinifera* and its allies: Diagnostics from morphology to DNA barcoding. *Med. Mycol.* **2008**, *46*, 193–208, doi:10.1080/13693780701799217.
- Isola, D.; Zucconi, L.; Onofri, S.; Caneva, G.; de Hoog, G.S.; Selbmann, L. Extremotolerant rock inhabiting black fungi from Italian monumental sites. *Fungal Divers.* **2016**, *76*, 75–96, doi:10.1007/s13225-015-0342-9.
- Crous, P.; Groenewald, J. Why everlastings don't last. *Persoonia—Mol. Phylogeny Evol. Fungi* **2011**, *26*, 70–84, doi:10.3767/003158511x574532.
- de Hoog, G.; Vicente, V.; Najafzadeh, M.J.; Harrak, M.; Badali, H.; Seyedmousavi, S. Waterborne *Exophiala* species causing disease in cold-blooded animals. *Persoonia—Mol. Phylogeny Evol. Fungi* **2011**, *27*, 46–72, doi:10.3767/003158511x614258.
- Bates, S.T.; Reddy, G.S.N.; Garcia-Pichel, F. *Exophiala crusticola* anam. nov. (affinity Herpotrichiellaceae), a novel black yeast from biological soil crusts in the Western United States. *Int. J. Syst. Evol. Microbiol.* **2006**, *56*, 2697–2702, doi:10.1099/ijs.0.64332-0.
- Prenafeta-Boldú, F.X.; Summerbell, R.; de Hoog, G.S. Fungi growing on aromatic hydrocarbons: biotechnology's unexpected encounter with biohazard? *FEMS Microbiol. Rev.* **2006**, *30*, 109–130, doi:10.1111/j.1574-6976.2005.00007.x.
- de Hoog, G.S.; Vicente, V.; Caligiorme, R.B.; Kantarcioglu, S.; Tintelnnot, K.; Gerrits van den Ende, A.H.G.; Haase, G. Species diversity and polymorphism in the *Exophiala spinifera* clade containing opportunistic black yeast-like fungi. *J. Clin. Microbiol.* **2003**, *41*, 4767–4778, doi:10.1128/jcm.41.10.4767-4778.2003.
- Isola, D.; Selbmann, L.; de Hoog, G.S.; Fenice, M.; Onofri, S.; Prenafeta-Boldú, F.X.; Zucconi, L. Isolation and screening of black fungi as degraders of volatile aromatic hydrocarbons. *Mycopathologia* **2013**, *175*, 369–379, doi:10.1007/s11046-013-9635-2.
- Lian, X.; de Hoog, G.S. Indoor wet cells harbour melanized agents of cutaneous infection. *Med Mycol.* **2010**, *48*, 622–628, doi:10.3109/13693780903405774.
- Seyedmousavi, S.; Badali, H.; Chlebicki, A.; Zhao, J.; Prenafeta-Boldú, F.X.; de Hoog, G.S. *Exophiala sideris*, a novel black yeast isolated from environments polluted with toxic alkyl benzenes and arsenic. *Fungal Biol.* **2011**, *115*, 1030–1037, doi:10.1016/j.funbio.2011.06.004.
- de Hoog, G.S.; Zeng, J.S.; Harrak, M.J.; Sutton, D.A. *Exophiala xenobiotica* sp. nov., an opportunistic black yeast inhabiting environments rich in hydrocarbons. *Antonie van Leeuwenhoek* **2006**, *90*, 257–268, doi:10.1007/s10482-006-9080-z
- Liu, X.-Y.; Udayanga, D.; Luo, Z.-L.; Chen, L.-J.; Zhou, D.-Q.; Su, H.Y.; Hyde, K.D. Backbone tree for Chaetothyriales with four new species of *Minimelanolocus* from aquatic habitats. *Fungal Biol.* **2015**, *119*, 1046–1062, doi:10.1016/j.funbio.2015.08.005.
- Vigueras, G.; Arriaga, S.; Shirai, K.; Morales, M.; Revah, S. Hydrophobic response of the fungus *Rhinochlamydia similis* in the biofiltration with volatile organic compounds with different polarity. *Biotechnol. Lett.* **2009**, *31*, 1203–1209, doi:10.1007/s10529-009-9987-3.
- Hubka, V.; Réblová, M.; Řehulka, J.; Selbmann, L.; Isola, D.; de Hoog, S.G.; Kolarik, M. *Bradymyces* gen. nov. (Chaetothyriales, Trichomeriaceae), a new ascomycete genus accommodating poorly differentiated melanized fungi. *Antonie van Leeuwenhoek* **2014**, *106*, 979–992, doi:10.1007/s10482-014-0267-4.
- Řeblová, M.; Hubka, V.; Thureborn, O.; Lundberg, J.; Sallstedt, T.; Wedin, M.; Ivarsson, M. From the tunnels into the treetops: new lineages of black yeasts from biofilm in the Stockholm metro system and their relatives among ant-associated fungi in the Chaetothyriales. *PLoS ONE* **2016**, *11*, e0163396, doi:10.1371/journal.pone.0163396.
- He, F.; Lin, B.; Sun, J.; Liu, X. *Knufia aspidiotus* sp. nov., a new black yeast from scale insects. *Phytotaxa* **2013**, *153*, 39–50, doi:10.11646/phytotaxa.153.1.2.
- Hutchison, L.J.; Untereiner, W.A.; Hiratsuka, Y. *Knufia cryptophialidica* gen. et sp. nov., a dematiaceous hyphomycete isolated from black galls of trembling aspen (*Populus tremuloides*). *Mycologia* **1995**, *87*, 902–908, doi:10.1080/00275514.1995.12026613.
- Tsuneda, A.; Currah, R.S. *Knufia endospora*, a new dematiaceous hyphomycete from trembling aspen. *Rep. Tottori. Mycol. Inst.* **2004**, *4*, 1–9.
- Li, D.M.; de Hoog, G.S.; Saunte, D.M.L.; Gerrits van den Ende, A.H.G.; Chen, X.R. *Coniosporium epidermidis* sp. nov., a new species from human skin. *Stud. Mycol.* **2008**, *61*, 131–136, doi:10.3114/sim.2008.61.13.



23. Schiaparelli, S.; Selbmann, L.; Onofri, S.; Zucconi, L.; Isola, D.; Rottigni, M.; Ghiglione, C.; Piazza, P.; Alvaro, M.C. Distributional records of Antarctic fungi based on strains preserved in the Culture Collection of Fungi from Extreme Environments (CCFEE) Mycological Section associated with the Italian National Antarctic Museum (MNA). *MycKeys* **2015**, *10*, 57–71, doi:10.3897/mycokeys.10.5343
24. Sun, W.; Su, L.; Yang, S.; Sun, J.; Liu, B.; Fu, R.; Wu, B.; Liu, X.; Cai, L.; Guo, L.; et al. Unveiling the hidden diversity of rock-inhabiting fungi: Chaetothyriales from China. *J. Fungi* **2020**, *6*, 187, doi:10.3390/jof6040187.
25. Mehrabi, M.; Asgari, B.; Hemmati, R. *Knufia perfecta*, a new black yeast from Iran, and a key to *Knufia* species. *Nova Hedwig*. **2018**, *106*, 519–534, doi:10.1127/nova\_hedwigia/2017/0450.
26. Nai, C.; Wong, H.Y.; Pannenbecker, A.; Broughton, W.J.; Benoit, I.; de Vries, R.; Gueidan, C.; Gorbushina, A.A. Nutritional physiology of a rock-inhabiting, model microcolonial fungus from an ancestral lineage of the Chaetothyriales (Ascomycetes). *Fungal Genet. Biol.* **2013**, *56*, 54–66, doi:10.1016/j.fgb.2013.04.001.
27. Matos, T.; de Hoog, G.S.; de Boer, A.G.; de Crom, I.; Haase, G.M. High prevalence of the neurotrope *Exophiala dermatitidis* and related oligotrophic black yeasts in sauna facilities. *Mycoses* **2002**, *45*, 373–377, doi:10.1046/j.1439-0507.2002.00779.x.
28. Crous, P.; Wingfield, M.; Lombard, L.; Roets, F.; Swart, W.; Alvarado, P.; Carnegie, A.; Moreno, G.; Luangsa-Ard, J.; Thangavel, R.; et al. Fungal Planet description sheets: 951–1041. *Persoonia—Mol. Phylogeny Evol. Fungi* **2019**, *43*, 223–425, doi:10.3767/persoonia.2019.43.06.
29. Crous, P.W.; Schroers, H.-J.; Groenewald, J.Z.; Braun, U.; Schubert, K. *Metulocladosporiella* gen. nov. for the causal organism of Cladosporium speckle disease of banana. *Mycol. Res.* **2006**, *110*, 264–275, doi:10.1016/j.mycres.2005.10.003.
30. Chomnunti, P.; Bhat, D.J.; Jones, E.B.G.; Chuksatirote, E.; Bahkali, A.H.; Hyde, K.D. Trichomeriaceae, a new sooty mould family of Chaetothyriales. *Fungal Divers.* **2012**, *56*, 63–76, doi:10.1007/s13225-012-0197-2.
31. Egidi, E.; de Hoog, G.S.; Isola, D.; Onofri, S.; Quaedvlieg, W.; De Vries, M.; Verkley, G.J.M.; Stielow, J.B.; Zucconi, L.; Selbmann, L. Phylogeny and taxonomy of meristematic rock-inhabiting black fungi in the Dothideomycetes based on multi-locus phylogenies. *Fungal Divers.* **2014**, *65*, 127–165, doi:10.1007/s13225-013-0277-y.
32. Dugan, F.; Braun, U.; Groenewald, J.; Crous, P. Morphological plasticity in *Cladosporium sphaerospermum*. *Persoonia—Mol. Phylogeny Evol. Fungi* **2008**, *21*, 9–16, doi:10.3767/003158508x334389.
33. Bensch, K.; Groenewald, J.; Braun, U.; Dijksterhuis, J.; Yáñez-Morales, M.D.J.; Crous, P. Common but different: The expanding realm of *Cladosporium*. *Stud. Mycol.* **2015**, *82*, 23–74, doi:10.1016/j.simyco.2015.10.001.
34. Crous, P.; Shivas, R.; Wingfield, M.; Summerell, B.; Rossman, A.; Alves, J.; Adams, G.; Barreto, R.; Bell, A.; Coutinho, M.; et al. Fungal Planet description sheets: 128–153. *Persoonia—Mol. Phylogeny Evol. Fungi* **2012**, *29*, 146–201, doi:10.3767/003158512X661589.
35. Martin-Sanchez, P.M.; Novakova, A.; Bastian, F.; Alabouvette, C.; Saiz-Jimenez, C. Two new species of the genus *Ochroconis*, *O. lascauxensis* and *O. anomala* isolated from black stains in Lascaux Cave, France. *Fungal Biol.* **2012**, *116*, 574–589, doi:10.1016/j.funbio.2012.02.006.
36. Samerpitak, K.; Gerrits van den Ende, A.H.G.; Menken, S.B.J.; de Hoog, G.S. Three new species of the genus *Ochroconis*. *Mycopathologia* **2015**, *180*, 7–17, doi:10.1007/s11046-015-9910-5.
37. Crous, P.; Wingfield, B.; Burgess, T.; Hardy, G.; Crane, C.; Barrett, S.; Cano-Lira, J.F.; Le Roux, J.; Thangavel, R.; Guarro, J.; et al. Fungal Planet description sheets: 469–557. *Persoonia—Mol. Phylogeny Evol. Fungi* **2016**, *37*, 218–403, doi:10.3767/003158516x694499.
38. Giraldo, A.; Sutton, D.A.; Samerpitak, K.; de Hoog, G.S.; Wiederhold, N.; Guarro, J.; Gené, J. Occurrence of *Ochroconis* and *Verruconis* species in clinical specimens from the United States. *J. Clin. Microbiol.* **2014**, *52*, 4189–4201, doi:10.1128/jcm.02027-14.
39. Crous, P.; Wingfield, M.; Richardson, D.; Le Roux, J.; Strasberg, D.; Edwards, J.; Roets, F.; Hubka, V.; Taylor, P.; Heykoop, M.; et al. Fungal Planet description sheets: 400–468. *Persoonia—Mol. Phylogeny Evol. Fungi* **2016**, *36*, 316–458, doi:10.3767/003158516x692185.
40. Samerpitak, K.; Duarte, A.P.M.; Attili-Angelis, D.; Pagnocca, F.C.; Heinrichs, G.; Rijs, A.J.M.M.; Alfjorden, A.; Gerrits van den Ende, A.H.G.; Menken, S.B.J.; de Hoog, G.S. A new species of the oligotrophic genus *Ochroconis* (Sympoventuriaceae). *Mycol. Prog.* **2015**, *14*, 1–10, doi:10.1007/s11557-015-1023-5.
41. Samerpitak, K.; Van der Linde, E.; Choi, H.-J.; Gerrits van den Ende, A.H.G.; Machouart, M.; Gueidan, C.; de Hoog, G.S. Taxonomy of *Ochroconis*, genus including opportunistic pathogens on humans and animals. *Fungal Divers.* **2014**, *65*, 89–126, doi:10.1007/s13225-013-0253-6.
42. Crous, P.W.; Shivas, R.; Quaedvlieg, W.; Van Der Bank, M.; Zhang, Y.; Summerell, B.; Guarro, J.; Wingfield, M.J.; Wood, A.; Alfenas, A.; et al. Fungal Planet description sheets: 214–280. *Persoonia—Mol. Phylogeny Evol. Fungi* **2014**, *32*, 184–306, doi:10.3767/003158514x682395.
43. Crous, P.W.; Wingfield, M.J.; Le Roux, J.J.; Richardson, D.M.; Strasberg, D.; Shivas, R.G.; Groenewald, J.Z. Fungal Planet description sheets: 371–399. *Persoonia* **2015**, *35*, 264, doi:10.3767/003158515X69026.
44. Jayasiri, S. Diversity, morphology and molecular phylogeny of Dothideomycetes on decaying wild seed pods and fruits. *Mycosphere* **2019**, *10*, 1–186, doi:10.5943/mycosphere/10/1/1.
45. Machouart, M.; Samerpitak, K.; de Hoog, G.S.; Gueidan, C. A multigene phylogeny reveals that *Ochroconis* belongs to the family Sympoventuriaceae (Venturiales, Dothideomycetes). *Fungal Divers.* **2014**, *65*, 77–88, doi:10.1007/s13225-013-0252-7
